# Supplementary material
Source: publisher site journal article supplement (https://www.dovepress.com/article/438883)
Supplement: Supplementary file 1 [file get_supplementary_file.php]

**Table S1: Survey questionnaire**

| **Question** | **Response** |
| --- | --- |
| **Overall receptivity to RebiSmart® 3.0** | |
| Based on the video, please rate how appealing you [nurses/patients] find Device Q. *(Ratings based on devices independent of treatments they are associated with)* | 1-Not at all appealing 2-Not very appealing 3-Somewhat appealing 4-Very appealing 5-Extremely appealing |
| Using the below scale, please rate how interested you [nurses/patients] are in learning more about Device Q, based on what you saw in the video. *(Ratings based on devices independent of treatments they are associated with)* | 1-Not at all interested 2-Not very interested 3-Somewhat interested 4-Very interested 5-Extremely interested |
| Based on what you saw in the video, how comfortable would you be [Patients: using] and [Nurses: initiating and educating patients on] Device Q? *(Ratings based on devices independent of treatments they are associated with)* | 1-Not at all comfortable 2-Not very comfortable 3-Somewhat comfortable 4-Very comfortable 5-Extremely comfortable |
| **Importance of device feature to user satisfaction** | |
| For the below list of device features, please select the ONE feature that you think is MOST important to your satisfaction and the one feature you think is LEAST important to your satisfaction, when evaluating how satisfied you are with self-injecting devices for your MS treatment§.   1. Touchscreen / Controls / Control panel 2. Adherence tracking / captures injection history and/or planning 3. Hidden needle 4. Customizable injection process (including injection speed, hold time, depth, rotation guide, etc.) 5. Reusability 6. Audio feedback/prompts to ensure proper use 7. Visual feedback/prompts to ensure proper use 8. Self-injection process 9. Adjustable device settings 10. Size of device 11. Device setup process 12. Amount of time to complete device setup process | Scale of most important (very satisfied) and least important (not at all) |
| **Performance of RebiSmart® 3.0 versus other self-injecting devices on key features** | |
| For each of the following features, how would you rate the performance of the self-injecting devices you [patient: use to receive your MS treatment] [Nurse: initiate and educate patients on]? *(Satisfaction rating based on devices independent of treatments they are associated with)*   1. Touchscreen / Controls / Control panel 2. Adherence tracking / captures injection history and/or planning 3. Hidden needle 4. Customizable injection process (including injection speed, hold time, depth, rotation guide, etc.) 5. Reusability 6. Audio feedback/prompts to ensure proper use 7. Visual feedback/prompts to ensure proper use 8. Self-injection process 9. Adjustable device settings 10. Size of device 11. Device setup process 12. Amount of time to complete device setup process | N/A – Device does not have this feature  1- Poor  2- Fair  3- Good  4- Very good  5- Excellent |
| Please rate how well you [nurses/patients] expect Device Q to perform across each of the following features, based on the video you watched? *(Ratings based on devices independent of treatments they are associated with)*   1. Touchscreen / Controls / Control panel 2. Adherence tracking / captures injection history and/or planning 3. Hidden needle 4. Customizable injection process (including injection speed, hold time, depth, rotation guide, etc.) 5. Reusability 6. Audio feedback/prompts to ensure proper use 7. Visual feedback/prompts to ensure proper use 8. Self-injection process 9. Adjustable device settings 10. Size of device 11. Device setup process 12. Amount of time to complete device setup process | 1- Poor  2- Fair  3- Good  4- Very good  5- Excellent |
| Which of these features of Device Q do you have questions or concerns about that you would like more information on?   1. Touchscreen / Controls / Control panel 2. Adherence tracking / captures injection history and/or planning 3. Hidden needle 4. Customizable injection process (including injection speed, hold time, depth, rotation guide, etc.) 5. Reusability 6. Audio feedback/prompts to ensure proper use 7. Visual feedback/prompts to ensure proper use 8. Self-injection process 9. Adjustable device settings 10. Size of device 11. Device setup process 12. Amount of time to complete device setup process 13. Other (please specify) 14. None / I have no concerns [mutually exclusive, anchor] | (Select all that apply: Randomize) |
| **Nurses’ recommendations** | |
| Please rank the top 3 features of Device Q that manufactures should provide additional materials or education on for patients with MS who may use this device.   1. Touchscreen / Controls / Control panel 2. Adherence tracking / captures injection history and/or planning 3. Hidden needle 4. Customizable injection process (including injection speed, hold time, depth, rotation guide, etc.) 5. Reusability 6. Audio feedback/prompts to ensure proper use 7. Visual feedback/prompts to ensure proper use 8. Self-injection process 9. Adjustable device settings 10. Size of device 11. Device setup process 12. Amount of time to complete device setup process 13. Other (please specify) | Randomize drag and drop format, to rank only 3  *Give a 1 to the top features, a 2 to the second top feature, and so on* |

§This question was asked multiple times and only four features were shown at a time and were randomized in each screenshot; thus, the respondent would end up seeing a single feature listed on different screenshots.

MS, multiple sclerosis.
